1 **Mechanical wounding impacts the growth versus defence balance in tomato (*Solanum***  
2 ***lycopersicum*)**

3 Ana Flavia Aparecida Cunha<sup>1,2</sup>, Pedro Henrique Duarte Rodrigues<sup>2</sup>, Ana Clara Anghinoni<sup>2</sup>,  
4 Vinicius Juliani de Paiva<sup>2</sup>, Daniel Gonçalves da Silva Pinheiro<sup>2,3</sup> and Marcelo Lattarulo  
5 Campos<sup>1,2,3,\*</sup>.

6

7 <sup>1</sup>- *Programa de Pós-Graduação em Biologia Vegetal, Universidade Federal de Mato Grosso,*  
8 *Cuiabá/MT, Brazil - 78060-900*

9 <sup>2</sup>- *Integrative Plant Research Laboratory, Departamento de Botânica e Ecologia, Instituto de*  
10 *Biociências, Universidade Federal de Mato Grosso, Cuiabá/MT, Brazil.*

11 <sup>3</sup>- *Programa de Pós-Graduação em Ecologia e Conservação da Biodiversidade, Universidade*  
12 *Federal de Mato Grosso, Cuiabá/MT, Brazil - 78060-900*

13 \* - Author for correspondence: marcelo.campos@ufmt.br, Twitter: @lattarulo

14

15 **Authors e-mail addresses:** A.F.A.C.: anaflaviarep@hotmail.com; P.H.D.R.:  
16 pedroduarte.biologia@gmail.com; A.C.A.: anghinonianaclara@gmail.com; V.J.P.:  
17 paivavinicius4@gmail.com; D.G.S.P.: daniel.pinheiro1997@gmail.com; M.L.C.:  
18 marcelo.campos@ufmt.br.

19 **ORCID:** A.F.A.C.: 0000-0003-3466-7658; P.H.D.R.: 0000-0003-1377-3523; A.C.A.: 0000-  
20 0002-0106-8184; V.J.P.: 0000-0001-9189-1272; D.G.S.P.: 0000-0002-4140-6870; M.L.C.: 0000-  
21 0001-6235-5120

22 **Date of submission:** 11/24/2022

23 **Word count:** 3,281

24 **Tables:** 0

25 **Figures:** 3

26 **Supplemental materials:** 4 (2 supplemental figures and 2 supplemental tables)

27 **Running title:** Mechanical wounding affects growth and defence in tomato

28

29 **Highlight**

30 Antagonism between growth and defence responses was observed in tomato plants subject to  
31 mechanical wounding, a treatment that hinders development while promoting the activation of  
32 anti-herbivore traits.

33 **Abstract**

34 Plants have evolved elaborate surveillance systems that allow them to perceive the attack by pests  
35 and pathogens and activate the appropriate defences. Mechanical stimulation, such as mechanical  
36 wounding, represents one of the most reliable cues for the perception of potential herbivore  
37 aggressors. Here we demonstrate that mechanical wounding disturbs the growth versus defence  
38 balance in tomato, a physiological condition where growth reduction arises as a pleiotropic  
39 consequence of the activation of defence responses (or vice-versa). We observed that consecutive  
40 lesions on tomato leaves impairs the formation of several growth-related traits, including shoot  
41 elongation, leaf expansion and time for flowering set, while concomitantly activating the  
42 production of defence responses such as trichome formation and the upregulation of defence-  
43 related genes. We also provide genetic evidence that this wound-induced growth repression is a  
44 consequence of tomato plants sensing the injuries via jasmonates (JAs), a class of plant hormones  
45 known to be master regulators of the plant growth versus defence balance. Besides providing a  
46 mechanistic explanation on how the growth and defence balance is shifted when plants are  
47 subjected to a specific type of mechanical stimulus, our results may offer a practical explanation  
48 for why tomato productivity is so negatively impacted by herbivore attack.

49

50 **Keywords:** Growth-defence trade-offs, pests, jasmonates, flowering, trichomes, mechanical  
51 stimulus

52 **Abbreviations:** cv, cultivar; DAW, days after wounding; *GAPDH*, *Glyceraldehyde phosphate*  
53 *dehydrogenase*; JA, jasmonate; *jail-1*, *jasmonate insensitive1-1*; MT, Micro-Tom; *PI-I*,  
54 *Proteinase inhibitor I*; *PI-II*, *Proteinase inhibitor II*.

## 55 **Introduction**

56           Plants are constantly challenged by a myriad of pest and pathogens that utilize the green  
57 tissues as a source for nutritional needs. To survive, plants have evolved elaborate surveillance  
58 systems that allow them to perceive the potential aggressor and trigger the appropriate defence  
59 responses. In this sense, mechanical stimulation represents one of the most consistent cues for  
60 recognition of attacking herbivores (Waterman et al., 2019; Kollasch et al., 2020; Matsumara et  
61 al., 2022). When subjected to mechanical stimulation, such as that caused by arthropod movement  
62 or tissue injury, plants can activate diverse signalling cascades that culminate in the activation of  
63 multiple defence barriers, including the induction of trichomes, the synthesis of toxic metabolites  
64 and the production of proteinase inhibitors (PIs) (Green and Ryan, 1972; Traw and Bergelson,  
65 2003; Howe and Jander, 2008; Mostafa et al., 2022). It is also recognized that mechanosensory  
66 stimuli can trigger large modifications in plant transcriptional activity, leading to the upregulation  
67 of numerous defence-related genes (Heidel-Fischer, 2014; Matsumara et al., 2022). However, due  
68 to the diversity and complexity of this kind of environmental signal, several gaps remain in our  
69 knowledge to understand the molecular framework utilized by plants to sense specific types of  
70 mechanical stimulation and what are the overall consequences of its perception to plant  
71 development besides the activation of defence responses.

72           Mechanical wounding is a simple and reproducible technique to study the consequences  
73 of mechanical stimulation in plants. This procedure, which is commonly referred as “simulated  
74 herbivory”, consists of using razors or other mechanical means to produce similar damage patterns  
75 in the plant tissues as those caused by arthropod herbivores (Baldwin, 1990; Zhang and Turner,  
76 2008; Waterman et al., 2019). Even though differences between artificial and true herbivory have  
77 been largely highlighted in literature (e.g., Baldwin, 1990; Reymond et al., 2000, Lehtilä and Boalt,  
78 2008), mechanical wounding still stands out as the most useful and frequently employed tools to  
79 decipher the mechanisms underlying herbivore-induced responses in plants. In fact, numerous  
80 ground-breaking discoveries into the molecular aspects of the plant immune system were revealed  
81 by subjecting plants to mechanical wounding, including the dynamics of local and systemic  
82 responses to insect damage, the action of plant hormones such as jasmonates (JAs) and ethylene  
83 in the induction of defence responses and the role of host-cell derived molecules as endogenous  
84 immune signals (Green and Ryan, 1972; Creelman et al., 1992; Constabel et al., 1995; O’Donnell  
85 et al., 1996; Li et al., 2002; Zhang and Turner, 2008; Fiorucci et al., 2022). These collective

86 findings provide a long and lasting impetus to utilize mechanical wounding as a method to  
87 elucidate the consequences of mechanical stimulation in plants.

88 Tomato (*Solanum lycopersicum*) is the most important horticulture crop in the world and a  
89 valuable model to study plant genetics and development (Carvalho et al., 2011; The Tomato  
90 Genome Consortium, 2012; Rohan et al., 2019). Tomato has classically served as a remarkable  
91 tool to uncover fundamental aspects of the plant defences to mechanical stimulus, including  
92 artificial and true herbivory, serving as a practical and useful system to understand the signal  
93 transduction events leading from injury to activation of defence responses (Green and Ryan, 1972;  
94 Farmer and Ryan, 1990; Constabel et al., 1995; Li et al., 2004; Campos et al., 2009; Wang et al.,  
95 2018). However, on an economical perspective, the production of this vegetable is still considered  
96 of high risk due to its remarkable susceptibility to diseases and pests, which cause severe losses in  
97 fruit quality, nutritional value, and yield (Gibertson and Batuman, 2013; Wang et al., 2021). This  
98 scenario indicates that, even though we have a robust knowledge on how tomato anti-herbivore  
99 traits are activated in response to biotic attack, a more holistic perspective is necessary to fully  
100 grasp the consequences of the mechanical stimulation caused by herbivory on plant development  
101 and to eventually develop methods aiming to mitigate the results of such stressful condition in our  
102 agroecosystems.

103 Here we demonstrate how mechanical wounding affects the overall development of tomato  
104 plants. Following the classical paradigm of “growth versus defence”, which invokes the existence  
105 of a physiological trade-off where activation of growth suppresses defence responses and vice-  
106 versa (Herms & Mattson, 1992; Huot et al., 2014; Sestari & Campos, 2022), we observed that  
107 repetitive lesions on tomato leaflets impairs the formation of multiple growth traits, including  
108 shoot elongation and flower formation, while concomitantly activating the production of defence  
109 responses such as trichome formation and the expression of anti-herbivory-related genes. We also  
110 found that this wound-induced growth reduction is dependent on jasmonates (JAs), a class of plant  
111 hormones broadly studied for its regulation of the growth versus defence antagonism (Yang et al.,  
112 2012; Leone et al., 2014; Campos et al., 2016; Guo et al., 2018a,b; Fiorucci et al., 2022). Besides  
113 providing a mechanistic perspective on how tomato plants adjust their development when  
114 subjected to a specific environmental stimulus, our results may offer a practical explanation for  
115 why tomato productivity is so negatively impacted by herbivores that wound green tissues to meet  
116 their nutritional demands.

## 117 **Material and methods**

### 118 **Plant material and growth conditions**

119 For all described experiments, plants were kept in a growth room at 26 °C ( $\pm 0.8$  °C), 66 %  
120 ( $\pm 10$  %) relative humidity under 16 h at a light intensity of 250  $\mu\text{M m}^{-2} \text{s}^{-1}$  and 8 h dark. Tomato  
121 (*Solanum lycopersicum*) seeds, cultivars Micro-Tom (cv. MT, kindly donated by prof. Lazaro E.  
122 P. Peres – Universidade de São Paulo, Brazil; Carvalho et al., 2011) and Santa Clara (commercially  
123 available from Feltrin Sementes ® – Farroupilha, Brazil), were germinated on plastic pots  
124 containing Carolina Soil (Carolina Soil ® – Santa Cruz do Sul, Brazil). Fourteen days after  
125 germination, seedlings were transplanted to individual pots also containing Carolina Soil.  
126 Irrigation was performed daily by supplying water to the trays containing the pots. Selection of  
127 *jasmonate insensitive1-1* (*jail-1*) homozygous plants was performed following a PCR-based  
128 genotyping protocol described by Li et al. (2004), with primers described in Supplemental Table  
129 S1. Apart from the experiment shown in the Supplemental Figure S1, where the cv. Santa Clara  
130 was used for estimation of growth rate, all data was obtained using the cv. MT.

131

### 132 **Mechanical wounding**

133 Twenty-five-day old tomato plants were subjected to mechanical wounding with the aid of  
134 a haemostat with serrated tip, following the protocols described by Zhang and Turner (2008) and  
135 Herde et al. (2013), with small adaptations. The haemostat tip was vigorously forced across the  
136 tomato leaflets to produce clearly visible lesions that cross the midvein (Figure 1A). All available  
137 true leaves were wounded at least once in a sequential manner, from the bottom to the top of the  
138 plant, and from the terminal to the basal leaflets, for a total of ten unique wounds per plant.  
139 Differently from described in the Zhang and Turner (2008) protocol, all ten lesions were performed  
140 in the same day.

141

### 142 **Evaluation of growth and flowering parameters**

143 Before lesions were performed, plants with similar height and leaf number were pre-  
144 selected to reduce variation among the population. Growth rate of control (unwounded) and  
145 wounded plants was determined by measuring shoot length with a measuring tape and by counting  
146 the number of true leaves formed during time. The same set of plants was subsequently used to  
147 assess the number of days taken to open the first flower (days for anthesis) and the number of

148 flowers formed at the 63-d timepoint. Estimation of leaf area was performed using ten fully  
149 expanded leaves taken from the middle section of 45-d old plants. Leaves were photographed and  
150 the resulting images were used to calculate total area using the ImageJ software (Schneider et al.,  
151 2012). Shoot fresh weight was evaluated by immediately weighting the excised aerial parts  
152 (without roots) of 45-d old plants in a precision scale. The material was then dried in an oven for  
153 five days and weighted again to estimate shoot dry weight.

154

### 155 **Evaluation of defence parameters**

156 Two traits directly related to resistance against herbivorous arthropods were evaluated as  
157 an indication of the activation of defence parameters in tomato: the density of leaf glandular and  
158 non-glandular trichomes and the expression of the anti-digestive and defence-related genes  
159 *Proteinase inhibitor I (PI-I)* and *Proteinase inhibitor II (PI-II)* (Li et al., 2004; Campos et al.,  
160 2009).

161 Trichome density was evaluated by marking a 0.25 cm<sup>2</sup> area in the terminal leaflet and  
162 counting every trichome found using a dissecting microscope. Tomato trichomes were identified  
163 based on stalk length and format and the presence and absence of terminal glands, according to  
164 Simmons and Gurr (2005). Since trichome density in tomato is dependent on leaf age (Li et al.,  
165 2004), measurements were performed on fully expanded leaves taken from the middle section of  
166 45 d-old plants. At that age, leaves that were previously wounded are all localized in the bottom  
167 section of the plants, thus not being utilized for trichome quantification.

168 For gene expression analysis, RNA was extracted from control and wounded leaflets of 26-  
169 d old plants, 24h after wounding. Frozen leaflets were homogenized with a mortar and pestle and  
170 total RNA was extracted from using a RNeasy kit (QIAGEN) with on-column DNase (QIAGEN)  
171 treatment. cDNA was reverse transcribed using 1µg total RNA with Superscript First Strand  
172 Synthesis System for RT-PCR (Invitrogen) with 18mer oligo-dT. All steps were performed  
173 following manufacturers protocols. Quantitative real-time amplification (qPCR) from reverse  
174 transcribed samples were conducted in a RotorGene 3000 thermocycler (Corbett Life Science,  
175 Australia) using primers for the tomato *PI-I* and *PI-II* genes (Supplemental Table S1). Evaluation  
176 of gene expression was performed using the method described by Livak and Schmittgen (2001),  
177 normalizing the transcript levels to the tomato *Glyceraldehyde phosphate dehydrogenase*



178 (GAPDH – Zhong & Simons, 1999). Three independent RNA samples (biological replicates)  
179 containing a pool of leaflets from three different plants were evaluated per treatment.

180

### 181 **Statistical analysis and data availability**

182 Statistical inferences were made using Student's *t*-test at the 5% level of significance, always  
183 comparing the treatments and genotypes to the MT control (unwounded). All experiments were  
184 independently repeated three times with similar results, using a minimum of 10 plants per  
185 treatment (unless otherwise noted). All data supporting the findings of this study are available from  
186 the corresponding author upon request.

187

## 188 **Results**

### 189 **Mechanical wounding hinders tomato development**

190 To evaluate the effects of mechanical lesions on tomato development we have adapted  
191 simple and reproducible protocols that are commonly utilized to study wound responses in the  
192 plant model *Arabidopsis thaliana* (Zhang and Turner, 2008, Herde et al., 2013). Briefly, 25 d old  
193 tomato plants (cv. MT) were wounded using a serrated haemostat that was firmly clamped across  
194 the leaflets, perpendicular to the midvein, to produce clearly visible lesions (Figure 1A). At this  
195 age, MT plants usually have two to four true leaves, all of which were wounded in a consecutive  
196 manner (see methods) for a total of ten wounds per plant. Measurements of shoot growth rate  
197 indicate that, as observed for *A. thaliana* (Yan et al., 2007; Zhang and Turner, 2008; Fiorucci et  
198 al., 2022; Shi et al., 2022), repetitive mechanical wounding significantly reduces the size of tomato  
199 plants (Figures 1B-C). Despite statistical significance in growth reduction ( $p < 0.05$ , according to  
200 Student's *t*-test) was only observed seven days after wounding (7 DAW, 32 d of age), shoot growth  
201 rate changed at early time points (3 and 4 DAW, 28 and 29 d of age, respectively) when compared  
202 to unwounded control (Figure 1B). At 42 d of age (17 DAW), shoots of wounded plants were  
203 35,6% shorter than those of control plants (Figure 1B). Similar results were obtained when  
204 mechanical wounding was performed in a commercially non-miniature tomato, cv. Santa Clara  
205 (Feltrin Sementes - Brazil), where lesions also begin to significantly reduced shoot growth rate 7  
206 DAW (32 d of age) when compared to control unwounded plants (Supplemental Figure S1).

207 Reduction in shoot stature is not the only developmental process that is negatively affected  
208 by mechanical wounding in tomato. We also observed that lesions hinder the capacity of MT plants

209 to develop new leaves, which is indicated by a significant reduction in the number of leaves per  
210 plant at 36 d (11 DAW, Figure 1D) and in the average leaf area at 45 d (20 DAW, Figure 1E) in  
211 wounded plants. Wounded plants also accumulate about 30% less aerial biomass (g of fresh  
212 weight) compared to control unwounded plants at 45 d (Figure 1F). Interestingly, no significant  
213 alteration (Student's t-test,  $p < 0.05$ ) in plant dry weight was observed (Supplemental Figure S2),  
214 suggesting that lesions may negatively affect water uptake or water retention in plants. Finally,  
215 wounding delayed tomato flowering as wounded plants took approximately 10d longer to open  
216 their first flower (Figure 1G) and developed 51% less flowers than control unwounded plants at  
217 63 d (Figure 1H). Taken together, our findings indicate that mechanical wounding hinders  
218 numerous growth and flowering traits in tomato plants.

219

## 220 **Wounding-induced growth reduction in tomato is dependent on jasmonate (JA) signalling**

221 Several lines of evidence indicates that plant responses to mechanical stimulation are  
222 largely dependent on JAs. For instance, JA levels are enhanced when plants are subjected to  
223 mechanical wounding (Creelman et al., 1992; Glauser et al., 2008; Pandey et al., 2017) and mutants  
224 impaired in JA signalling fail to activate responses to lesions (Yan et al., 2007; Chung et al., 2008;  
225 Zhang and Turner, 2008). To test if the wound-induced growth reduction observed in tomato is  
226 dependent on the JA signalling, we compared wounding responses of the tomato *jail-1* mutant to  
227 the MT wild type plants. *jail-1* carries a genetic lesion in the tomato homolog of CORONATINE  
228 INSENSITIVE1, an F-box protein that is an essential component of the JA receptor in plants (Li  
229 et al., 2004). For this reason, multiple JA-related responses are defective in *jail-1* (Li et al., 2004;  
230 Campos et al., 2009). While wounded MT plants display an apparent reduction in shoot elongation  
231 when compared to unwounded control MT plants, *jail-1* control, and wounded plants demonstrate  
232 strikingly similar growth rates (Figure 2A). This indicates that, as described for *A. thaliana*, the  
233 wound-induced growth reduction in tomato is dependent on a functional JA signalling pathway  
234 (Yan et al., 2007; Zhang and Turner, 2008; Campos et al., 2009). Interestingly, we noticed a  
235 tendency for *jail-1* plants to produce slight longer shoots than MT, even in the absence of  
236 mechanical stimulus. Even though this is a very subtle phenotype, with statistical differences  
237 evidenced only at a single time point (36-d – Figure 2A) and no visual differences observed in *jai-*  
238 *l* and MT control plants during the whole experiment (e.g., at 45-d-old plants – Figure 2B), it is  
239 tempting to speculate that JAs may act as endogenous negative regulators of growth in tomato. In

240 fact, similar results have been described in the literature for other plants such as *A. thaliana* and  
241 rice, where genetic mutations leading to impairment of the JA biosynthesis and signalling pathway  
242 led to plants with promoted growth traits such as longer hypocotyls, longer petioles, and early  
243 flowering (Yan et al., 2007; Yang et al., 2012; Major et al., 2017).

244

### 245 **Mechanical wounding promotes the activation of defence-related traits in tomato**

246 The classical growth versus defence paradigm indicates the existence of a growth versus  
247 defence trade-off in plants, where growth reduction may be a pleiotropic effect of the promotion  
248 of defence responses or vice-versa (Herms & Mattson, 1992; Huot et al., 2014; Ballaré and Austin,  
249 2019; Sestari & Campos, 2022). Thus, to evaluate if the reduced growth induced by our protocol  
250 of consecutive mechanical wounding is associated with activation of defence responses in tomato,  
251 we quantified the production of two defence-related traits in this species, the density of leaf  
252 trichomes and the expression of the defence-related genes *PI-I* and *PI-II* (Li et al., 2004; Campos  
253 et al., 2009).

254 Cultivated tomato (*S. lycopersicum*) possesses five types of trichomes which are usually  
255 classified as glandular or non-glandular, based on their length, number of cells and the presence  
256 of terminal glands (Simmons and Gurr, 2005). Quantification of trichome density performed on  
257 45-d-old plants (20 DAW), indicates that mechanical wounding promotes the formation of almost  
258 all trichomes types in both adaxial and abaxial sizes of newly formed tomato leaves (Supplemental  
259 Table S2). When compared to unwounded control plants, wounded plants produce three times  
260 more glandular trichomes and ~75% more non-glandular trichomes in their abaxial leaf faces  
261 (Figure 3A). A similar result was observed in the adaxial leaf face, where we observed an increase  
262 of 103.5% and 63% in the density of glandular and non-glandular trichomes, respectively, in  
263 wounded plants when compared to control (Figure 3B). These results are consistent with the  
264 described for *A. thaliana*, where artificial wounding also increases trichome density in leaves  
265 (Traw and Bergelson, 2003).

266 Next, we used qPCR to evaluate how wounding affects the expression of anti-herbivory  
267 related *PI-I* and *PI-II* genes. Quantification of gene expression performed on 26-d-old plants using  
268 RNA extracted from control or wounded leaves (1 DAW) indicates that this type of mechanical  
269 stimulation strongly upregulated the transcript levels of both genes (Figure 3C), as we observed  
270 an increase of 1300% and 330% in *PI-I* and *PI-II* levels, respectively, in wounded leaves when

271 compared to controls (Figure 3C). Even though the pattern of upregulation in *PI-I* and *PI-II* gene  
272 expression and protein production in response to lesions has been thoroughly documented in  
273 tomato (e.g., Green and Ryan, 1972; Li et al., 2002; Campos et al., 2009) this is, to our knowledge,  
274 the first description of how these genes behave when plants are submitted to repetitive mechanical  
275 wounding.

276 In sum, our results demonstrate that mechanical wounding disturbs the growth versus  
277 defence balance in tomato, promoting the activation of anti-herbivore-related traits (trichome  
278 density and *PI-I* and *PI-II* gene expression levels) while hindering the formation of development  
279 traits (plant growth and flowering parameters).

280

## 281 **Discussion**

282 The plant growth versus defence antagonism is physiological trade-off classically known  
283 for its profound impacts in plant development, which is now being recognized as one of the main  
284 factors controlling fitness and the genotypic composition of plants and its enemies in natural and  
285 agronomical ecosystems (Herms and Mattson, 1992; Huot et al., 2014; Züst et al., 2012; Bally et  
286 al., 2015; Fernandez et al., 2021). Efforts to understand the ecological advantages and the  
287 molecular framework regulating growth and defence indicate that this antagonism is context-  
288 dependent, where plants continuously monitor environmental inputs to adjust the balance between  
289 growth and defence as a strategy to optimize fitness for the specific environmental conditions in  
290 which they are subjected (Cipollini et al., 2014; Guo et al., 2018a; Ballaré and Austin, 2019; Sestari  
291 and Campos, 2022). However, several gaps remain in our understanding of how these  
292 environmental signals are integrated by the plant to regulate growth and defence processes  
293 concomitantly. For instance, it is not clear how the perception of specific danger inputs regulates  
294 the transition from growth- to defence-oriented development and the intensity of the external signal  
295 that should be perceived by the plant to reach a “physiological threshold” where the activation of  
296 defences may start to impact growth (or vice-versa). Our results shed some light in these topics,  
297 showing how a specific type of mechanical stimulus, the consecutive mechanical wounding  
298 performed at the early stages of tomato lifespan, induces this species to develop a morphological  
299 and physiological state where the plants active defence responses while hindering multiple growth-  
300 related traits. We demonstrate that this so-called “defence syndrome” (Ballaré and Austin, 2019)  
301 is remarkable for its rapid responses in the plant, such as the increased expression of *PI-I* and *PI-*

302 *Jl* genes a few hours after wounding (Figure 3C), and for its long-lasting effects, including the delay  
303 of flowering processes observed more than a month after the lesions were inflicted (Figures 1G-  
304 H). These observations may provide a feasible theory for why the productivity of tomato (and  
305 other important crops) is so negatively impacted by biotic stressors (Gibbertson and Batuman, 2013;  
306 Savary et al., 2019), as tissue lesions caused by pest and pathogens may cause similar durable and  
307 detrimental responses to growth as the ones observed when subjecting plants to artificial wounding.

308 One important finding of our work was that the wound-induced growth repression in  
309 tomato is mediated by a class of signalling molecules, the JAs. The main evidence for this was the  
310 observation that, when we subjected a tomato mutant insensitive to JA (*jail-1*) to mechanical  
311 wounding, no differences in shoot growth were observed when compared to unwounded  
312 control plants (Figures 2A-B). These results suggest that the wound-induced growth repression is  
313 not a direct consequence of overall physiological disorders that may occur in damaged tissues (e.g.,  
314 a reduction in photosynthesis parameters caused by crushing part of the leaflets), but rather by the  
315 plant sensing the injuries and activating the JA signalling pathway, which in turn, arrests shoot  
316 growth. JAs have been described as potent growth inhibitors in numerous plant species, including  
317 tomato, and this class of plant hormones is among the main regulators of the wound-induced  
318 defence syndrome in *A. thaliana* (Li et al., 2004; Zhang and Turner, 2008; Fiorucci et al., 2022).  
319 While previous work indicates that the tomato *jail-1* is defective in the formation of defence-related  
320 traits, including trichome formation and wound-mediated upregulation of *PIs* (Li et al., 2004;  
321 Campos et al., 2009), using this mutant we were able to provide direct evidence that endogenous  
322 JAs regulate tomato growth in response to external stimulus. Taken together, these results further  
323 reinforce the current idea that JAs evolved as central modulators of the growth versus defence  
324 antagonism in plants (Yang et al., 2012; Leone et al., 2014; Campos et al., 2014; Campos et al.,  
325 2016; Guo et al., 2018a,b; Fiorucci et al., 2022).

326 Tomato has long been utilized as a model system to study defence responses in plants and  
327 there is an extensive literature on the effects of wounding as a potent inducer of defence responses  
328 in this species (reviewed in Wasternack et al., 2006). On the other hand, while wound-induced  
329 growth repression has been documented for other plant species (Zhang and Turner, 2008;  
330 Engelberth and Engelberth, 2019) few descriptions of the consequences of mechanical stimulation  
331 to tomato overall development have been shown to this date (Stankovic and Davies 1998; Bhatia  
332 et al., 2005). We speculate that this discrepancy is caused by the intensity of the wounding stress

333 applied to the plants, as fewer than ten lesions applied at a single timepoint may not be sufficient  
334 to produce an obvious disruption of the growth versus defence balance in tomato. Indeed, it has  
335 been long demonstrated that an increasing number of wounds trigger a more robust defence  
336 response in tomato plants (Green and Ryan, 1972), which may, in turn, generate a more impactful  
337 and easily detectable trade-off to development. This hypothesis may also be expanded to other  
338 plant species, as the frequently documented wound-induced growth repression in *A. thaliana* is  
339 observed under protocols that cause substantial damage to the leaves, in a similar manner to those  
340 applied in our experiment (Yan et al., 2007; Zhang and Turner, 2008; Fiorucci et al., 2022; Shi et  
341 al., 2022). Interestingly, the observation that gentle types of environmental inputs such as rain,  
342 wind, touch, and even sound waves can arrest plant development (Braam and Davies, 1990;  
343 Waterman et al., 2019; Matsumara et al., 2022) may indicate that plants utilize different signalling  
344 cascades to perceive and differentially respond to specific types of mechanical stimuli.

345 Our results also demonstrate that the wound-induced growth repression in tomato does not  
346 depend on the genetic background of the plants utilized, as similar results were obtained in two  
347 different tomato cv. with different physical architecture (a miniature and non-miniature one –  
348 Supplemental Figure S1). In fact, preliminary data obtained in our laboratory may indicate that  
349 this response is conserved among the Solanaceae family members, as other species belonging to  
350 this group (e.g., eggplant, and wild tomato species) also demonstrated reduction in growth-related  
351 traits when these plants were subjected to mechanical wounding (data not shown). These  
352 observations also support the now well accepted conception that the cv. MT can be employed, with  
353 numerous benefits, as a tool to study growth and hormone interactions in tomato (Marti et al.,  
354 2006; Campos et al., 2009; Campos et al. 2010; Carvalho et al.; 2011; Kobayashi et al., 2014).

355 In conclusion, we here show that mechanical wounding stunt tomato growth (in a JA-  
356 dependent manner) while concomitantly activating defence responses. For millions of years plant  
357 have been co-evolving with an astonishing number of arthropod herbivores capable of inflicting  
358 mechanical damage to the green tissues (Grimaldi and Engel, 2005). In this scenario, the wound-  
359 induced disturbance in the balance between growth and defence possibly serves as an ecological  
360 strategy that evolved to make plants more resilient while less conspicuous to a potential aggressor.  
361 As our agronomical system depends on fast plant growth to achieve the desired productivity,  
362 understanding how tomato and other crop species adjust this growth versus defence antagonism in

363 response to mechanosensory stimulus is a fundamental step to mitigate the negative consequences  
364 of herbivory and to eventually achieve more reliable food systems worldwide.

365 **Acknowledgements**

366 The authors would like to thank Beatriz C. Araújo for support during *jail-1* genotyping  
367 experiments and Dr. Javier E. Moreno for critical comments on the manuscript.

368

369 **Authors contribution**

370 A.F.A.C., P.H.D.R. and M.L.C. designed research, A.F.A.C., P.H.D.R., A.C.A., V.J.P. and  
371 D.G.S.P. performed the experiments, A.F.A.C., P.H.D.R. and M.L.C. analysed the data and  
372 A.F.A.C. and M.L.C. wrote the manuscript.

373

374 **Funding**

375 This work was supported by the Fundação de Amparo à Pesquisa do Estado de Mato Grosso (grant  
376 number 0209246/2021) and Conselho Nacional de Desenvolvimento Científico e Tecnológico  
377 (grant number 402160/2021-5).

378

379 **Conflicts of interest**

380 Authors declare no conflicts of interest



381 **References**

- 382 **Baldwin IT.** 1990. Herbivory simulations in ecological research. *Trends in Ecology and Evolution*  
383 5, 91-93
- 384 **Ballaré CL, Austin AT.** 2019. Recalculating growth and defence strategies under competition:  
385 key roles of photoreceptors and jasmonates. *Journal of Experimental Botany* 70, 3425-3434.
- 386 **Bally J, Nakasugi K, Jia F, Jung H, Ho SYW, Wong M, Paul CM, Naim F, Wood CC,**  
387 **Crowhurst RN, et al.** 2015. The extremophile *Nicotiana benthamiana* has traded viral defence  
388 for early vigour. *Nature Plants* 1, 15165.
- 389 **Bhatia P, Ashwath N, Midmore DJ.** 2005. Effects of genotype, explant orientation, and  
390 wounding on shoot regeneration in tomato. *In Vitro Cellular & Developmental Biology-Plant* 41,  
391 457-464.
- 392 **Braam J, Davies RW.** 1990. Rain-, wind-, and touch-induced expression of calmodulin and  
393 calmodulin-related genes in Arabidopsis. *Cell* 60,357-364.
- 394 **Campos ML, Almeida M, Rossi ML, Martinelli AP, Junior CGL, Figueira A, Rampelotti-**  
395 **Ferreira FT, Vendramim JD, Benedito VA, Peres LEP.** 2009. Brassinosteroids Interact  
396 negatively with jasmonates in the formation of anti-herbivory traits in tomato. *Journal of*  
397 *Experimental Botany* 60, 4347-4361.
- 398 **Campos ML, Kang JH, Howe GA.** 2014. Jasmonate-triggered plant immunity. *Journal of*  
399 *Chemical Ecology* 40, 657-675.
- 400 **Campos ML, Yoshida Y, Major IT, Ferreira DO, Weraduwege SM, Froehlich JE, Johnson**  
401 **BF, Kramer DM, Jander G, Sharkey TD, et al.** 2016. Rewiring of jasmonate and phytochrome  
402 B signalling uncouples plant growth-defence tradeoffs. *Nature Communications* 7, 12570.
- 403 **Chung HS, Koo AJK, Gao X, Jayanty S, Thines B, Jones AD, Howe GA.** 2008. Regulation  
404 and function of Arabidopsis *JASMONATE ZIM*-domain genes in response to wounding and  
405 herbivory. *Plant Physiology* 146, 952-964.
- 406 **Cipollini D, Walters D, Voelckel C.** 2014. Costs of resistance in plants: from theory to evidence.  
407 In: *Annual Plant Reviews*. Chichester, UK; John Wiley and Sons, Ltd 47, 263-307.
- 408 **Constabel CP, Bergey DR, Ryan CA.** 1995. Systemin activates synthesis of wound-inducible  
409 tomato leaf polyphenol oxidase via the octadecanoid defence signaling pathway. *Proceedings of*  
410 *the National Academy of Sciences of the USA* 92, 407-411.

- 411 **Carvalho RF, Campos ML, Pino LE, Crestana SL, Zsogon A, Lima JE, Benedito VA, Peres**  
412 **LEP.** 2011. Convergence of developmental mutants into a single tomato model system: “Micro-  
413 Tom” as an effective toolkit for plant development research. *Plant Methods* 7, 18.
- 414 **Creelman RA, Tierney ML, Mullet JE.** 1992. Jasmonic acid/methyl jasmonate accumulate in  
415 wounded soybean hypocotyls and modulate wound gene expression. *Proceedings of the National*  
416 *Academy of Sciences of the USA* 89, 4938-4941.
- 417 **Engelberth J, Engelberth M.** 2019. The costs of green leaf volatile-induced defense priming:  
418 temporal diversity in growth responses to mechanical wounding and insect herbivory. *Plants* 8, 23.
- 419 **Farmer EE, Ryan CA.** 1990. Interplant communication: airborne methyl jasmonate induces  
420 synthesis of proteinase inhibitors in plant leaves. *Proceedings of the National Academy of Sciences*  
421 *of the USA* 87, 7713-7716.
- 422 **Farmer EE, Gasperini D, Acosta IF.** 2014. The squeeze cell hypothesis for the activation of  
423 jasmonate synthesis in response to wounding. *New Phytologist* 204, 282-288.
- 424 **Fernandez AR, Saez A, Quintero C, Gleiser G, Aizen MA.** 2021. Intentional and unintentional  
425 selection during plant domestication: herbivore damage, plant defensive traits and nutritional  
426 quality of fruit and seed crops. *New Phytologist* 231, 1586-1598.
- 427 **Fiorucci AS, Michaud O, Schmid-Siegert E, Trevisan M, Petrolati LA, Ince YC, Fankhauser**  
428 **C.** 2022. Shade suppresses wound-induced leaf repositioning through a mechanism involving  
429 *PHYTOCHROME KINASE SUBSTRATE (PKS)* genes. *PLOS Genetics* 18, e1010213.
- 430 **Gilbertson RL, Batuman O.** 2013. Emerging viral and other diseases of processing tomatoes:  
431 biology, diagnosis and management. *Acta Horticulturae* 971, 35-48.
- 432 **Glauser G, Grata E, Dubugnon L, Rudaz S, Farmer EE.** 2008. Spatial and temporal dynamics  
433 of jasmonate synthesis and accumulation in *Arabidopsis* in response to wounding. *Journal of*  
434 *Biological Chemistry* 283, 16400-16407.
- 435 **Green TR, Ryan CA.** 1972. Wound-induced proteinase inhibitor in plant leaves: a possible  
436 defence mechanism against insects. *Science* 175:776-777.
- 437 **Grimaldi D, Engel MS.** 2005. *Evolution of the insects.* Cambridge University Press, New York.
- 438 **Guo Q, Major IT, Howe GA.** 2018a. Resolution of growth-defence conflict: mechanistic insights  
439 from jasmonate signaling. *Current Opinion in Plant Biology* 44, 72-81.

- 440 **Guo Q, Yoshida Y, Major IT, Howe GA.** 2018b. JAZ repressors of metabolic defence promote  
441 growth and reproductive fitness in *Arabidopsis*. Proceedings of the National Academy of Sciences  
442 of the USA 115, E10768-E10777.
- 443 **Heidel-Fischer HM, Musser RO, Vogel H.** 2014. Plant transcriptomic responses to herbivory.  
444 Annual Plant Reviews 47, 155-196.
- 445 **Herde M, Koo AJ, Howe GA.** 2013. Elicitation of jasmonate-mediated defence responses by  
446 mechanical wounding and insect herbivory. In: Goossens A, Pauwels L, eds. Jasmonate Signaling:  
447 Methods and Protocols.
- 448 **Herms DA, Mattson WJ.** 1992. The dilemma of plants: to grow or defend. The Quarterly Review  
449 of Biology 67, 283-335.
- 450 **Howe GA, Jander G.** 2008. Plant immunity to insect herbivores. Annual Review of Plant Biology  
451 59: 41-66.
- 452 **Huot B, Yao J, Montgomery BL, He SY.** 2014. Growth-defence tradeoffs in plants: A balancing  
453 act to optimize fitness. Molecular Plant 7, 1267-1287.
- 454 **Kobayashi M, Nagasaki H, Garcia V, Just D, Bres C, Mauxion JP, Paslier MC, Brunel D,  
455 Suda K, Minakuchi Y, et al.** 2014. Genome-wide analysis of intraspecific DNA polymorphisms  
456 in “Micro-Tom”, a model cultivar of tomato (*Solanum lycopersicum*). Plant and Cell Physiology  
457 55, 445-454.
- 458 **Kollasch AM, Abdu-Kafi AR, Body MJA, Pinto CF, Appel HM, Cocroft RB.** 2020. Leaf  
459 vibrations produced by chewing provide a consistent acoustic target for plant recognition of  
460 herbivores. Oecologia 194: 1-13.
- 461 **Leone M, Keller MM, Cerrudo I, Ballaré CL.** 2014. To grow or defend? Low red:far-red ratios  
462 reduce jasmonate sensitivity in Arabidopsis seedlings by promoting DELLA degradation and  
463 increasing JAZ10 stability. New Phytologist 204:355-367.
- 464 **Lehtilä K, Boalt E.** 2008. The use and usefulness of artificial herbivory in plant-herbivore studies.  
465 In Insects and Ecosystem Function. Weisser, W.W. and Siemann, E., eds, pp. 257–275, Springer
- 466 **Li L, Li C, Lee G, Howe GA.** 2002. Distinct roles for jasmonate synthesis and action in the  
467 systemin wound response of tomato. Proceedings of the National Academy of Sciences of the USA  
468 99, 6416-6421.
- 469 **Li L, Zhao Y, McCaig B, Wingerd BA, Wang J, Whalon ME, Pichersky E, Howe GA.** 2004.  
470 The tomato homolog of CORONATINE-INSENSITIVE1 is required for the maternal control of

471 seed maturation, jasmonate-signaled defence responses, and glandular trichome development.  
472 Plant Cell 16, 126-143.

473 **Livak KJ, Schmittgen TD.** 2001. Analysis of relative gene expression data using real-time  
474 quantitative PCR and the  $2^{-\Delta\Delta C_T}$  method. Methods 25, 402-408.

475 **Major IT, Yoshida Y, Campos ML, Kapali G, Xin XF, Sugimoto K, Ferreira DO, He SY,**  
476 **Howe GA.** 2017. Regulation of growth-defence abalance by the JASMONATE ZIM-DOMAIN  
477 (JAZ)-MYC transcriptional module. New Phytologist 215, 1533-1547.

478 **Marti E, Gisbert C, Bishop GJ, Dixon MS, Garcia-Martinez JL.** 2006. Genetic and  
479 physiological characterization of tomato cv. Micro-Tom. Journal of Experimental Botany 57,  
480 2037-2047.

481 **Matsumara M, Nomoto M, Itaya T, Aratani Y, Iwamoto M, Matsuura T, Hayashi Y, Mori**  
482 **T, Mori T, Skelly MJ et al.** 2022. Mechanosensory trichomes cells evoke a mechanical stimuli-  
483 induced immune response in *Arabidopsis thaliana*. Nature Communications 13, 1216.

484 **Mostafa S, Wang Y, Zeng W, Jin B.** 2022. Plant responses to herbivory, wounding, and infection.  
485 International Journal of Molecular Science 23, 7031.

486 **O'Donnell PJ, Calvert C, Atzorn R, Wasternack C, Leyser HMO, Bowles DJ.** 1996. Ethylene  
487 as a signal mediating the wound response of tomato plants. Science 274, 1914-1917.

488 **Pandey SP, Srivastava S, Goel R, Lakhwani D, Singh P, Asif MH, Sane AP.** 2017. Simulated  
489 herbivory in chickpea causes rapid changes in defence pathways and hormonal transcriptional  
490 networks of JA/ethylene/GA/auxin within minutes of wounding. Scientific Reports 7, 1-14.

491 **Reymond P, Weber H, Damond M, Farmer EE.** 2000. Differential gene expression in response  
492 to mechanical wounding and insect feeding in *Arabidopsis*. The Plant Cell 12, 707-719.

493 **Rothan Cm Diouf I, Causse M.** 2019. Trait discovery and editing in tomato. The Plant Journal  
494 97, 73-90.

495 **Savary S, Willocquet L, Pethybridge SJ, Esker P, McRoberts N, Andy N.** 2019. The global  
496 burden of pathogens and pests on major food crops. Nature Ecology and Evolution 3, 430-439.

497 **Schneider C, Rasband WS, Eliceiri KW.** 2012. NIH image to ImageJ: 25 years of image analysis.  
498 Nature Methods 9, 671-675.

499 **Sestari I, Campos ML.** 2022. Into a dilemma of plants: the antagonism between chemical  
500 defences and growth. Plant Molecular Biology 109, 469-482.

- 501 **Shi Z, Wang H, Zhang Y, Jia L, Pang H, Feng H, Wang X.** 2022. The involvement of  
502 extracellular ATP in regulating the stunted growth of *Arabidopsis* plants by repeated wounding.  
503 *BMC Plant Biology* 22, 279.
- 504 **Simmons AT, Gurr GM.** 2005. Trichomes of *Lycopersicum* species and their hybrids: effects on  
505 pests and natural enemies. *Agricultural and Forest Entomology* 7, 265-276.
- 506 **Stankovic B, Davies E.** 1998. The wound response in tomato involves rapid growth and electrical  
507 responses, systemically up-regulated transcription of proteinase inhibitors and calmodulin and  
508 down-regulated translation. *Plant & Cell Physiology* 39, 268-274.
- 509 **The Tomato Genome Consortium.** 2012. The tomato genome sequence provides insights into  
510 fleshy fruit evolution. *Nature* 30, 635-641.
- 511 **Traw MB, Bergelson J.** 2003. Interactive effects of jasmonic acid, salicylic acid, and gibberellin  
512 on induction of trichomes in *Arabidopsis*. *Plant Physiology* 133, 1367-1375.
- 513 **Yan Y, Stolz S, Chetelat A, Reymond P, Pagni M, Dugunon L, Farmer EE.** 2007. A  
514 downstream mediator in the growth repression limb of the jasmonate pathway. *The Plant Cell* 19,  
515 2470-2483.
- 516 **Yang DL, Yao J, Mei CS, Tong XH, Zeng LJ, Li Q, Xiao LT, Sun TP, Li J, Deng XW, et al.**  
517 2012. Plant hormone jasmonate prioritizes defence over growth by interfering with gibberellin  
518 signaling cascade. *Proceedings of the National Academy of Sciences of the USA* 109, E1192-  
519 E1200.
- 520 **Wang L, Einig E, Almeida-Trapp M, Albert M, Fliegmann J, Mithofer A, Kalbacher H, Felix**  
521 **G.** 2018. The systemin receptor SYR1 enhances resistance of tomato against herbivorous insects.  
522 *Nature Plants* 4, 152-156.
- 523 **Wang X, Liu J, Zhu X.** 2021. Early real-time detection algorithm of tomato diseases and pests in  
524 the natural environment. *Plant Methods* 17, 43.
- 525 **Waterman JM, Cazzonelli CI, Hartley SE, Johnson SN.** 2019. Simulated herbivory: the key to  
526 disentangling plant defence responses. *Trends in Ecology and Evolution* 34, 447-458.
- 527 **Wasternack C, Stenzel I, Hause B, Hause G, Kutter C, Maucher H, Neumerkel J, Feussner**  
528 **I, Miersch O.** 2006. The wound response in tomato – role of jasmonic acid. *Journal of Plant*  
529 *Physiology.* 163, 297-306.
- 530 **Zhang Y, Turner JG.** 2008. Wound-induced endogenous jasmonates stunt plant growth by  
531 inhibiting mitosis. *PLoS One* 3, e3699

- 532 **Zhong H, Simons JW.** 1999. Direct comparison Direct comparison of GAPDH,  $\beta$ -actin,  
533 cyclophilin and 28S rRNA as internal standards for quantifying RNA levels under hypoxia.  
534 Biochemical and Biophysical Research Communications 259, 523–526.
- 535 **Züst T, Heichinger C, Grossniklaus U, Harrington R, Kliebenstein DJ, Turnbull LA.** 2012.  
536 Natural enemies drive geographic variation in plant defences. Science 338, 116-119.

537 **Figures legends**

538

539 **Figure 1. Effect of mechanical wounding on tomato development.** (A) Tomato (cv.MT) leaflets  
540 were repetitively wounded using a serrated haemostat that was firmly clamped across the tissue to  
541 cross the midvein and produce clearly visible lesions, as indicated by the red arrows (bar = 1 cm).  
542 (B) Effect of wounding on tomato growth rate. Lesions were performed when plants were 25-d  
543 old, as indicated by the dotted line. (C) Representative individuals of 42-d old control and wounded  
544 plants (17 DAW). (D) Leaf number of 36-d old (11 DAW) and (E) leaf area of 45-d old (20 DAW)  
545 control and wounded plants. (F) Shoot fresh weight of 45-d old (20 DAW) control and wounded  
546 plants. (G) Average days for anthesis and (H) number of flowers per plant in 63-d old (38 DAW)  
547 control and wounded individuals. Data in all graphs represent the mean  $\pm$  s.e.m of at least 8 plants.  
548 Controls represent unwounded plants. Asterisks denote significant differences between control and  
549 wounded plants at  $p < 0.05$  (Student's t-test).

550

551 **Figure 2. Tomato wound-induced growth repression is dependent on the jasmonate pathway.**  
552 (A) Effect of wounding on the growth rate of MT (wild-type) and *jail-1* mutant plants. Lesions  
553 were performed when plants were 25-d old (dotted line). Data represent the mean  $\pm$  s.e.m of at  
554 least 8 plants and asterisks denote significant differences when compared to MT control treatment  
555 (Student's t-test,  $p < 0.05$ ). (B) Representative individuals of 45-d old MT and *jail-1* control and  
556 wounded plants (20 DAW). Data in all graphs represent the mean  $\pm$  s.e.m of at least 8 plants.  
557 Controls represent unwounded plants.

558

559 **Figure 3. Mechanical wounding induces defence responses in tomato.** Effect of mechanical  
560 wounding on the formation of glandular trichomes (types I, VI and VII) and non-glandular  
561 trichomes (types III and V) on the abaxial (A) and adaxial (B) leaves of 45 d-old tomato (20 DAW).  
562 Data represent the mean  $\pm$  s.e.m of at least 10 plants. Asterisks denote significant differences  
563 between control and wounded plants at  $p < 0.05$  (Student's t-test). (C) qPCR analysis of *PI-I* and  
564 *PI-II* gene expression in control and wounded tomato leaflets. RNA was extracted using leaves of  
565 26 d-old plants (24 h after wounding). *PI-I* and *PI-II* expression was normalized according to  
566 *GAPDH* transcript levels. Controls represent unwounded plants.

567 **Supplemental Figure S1.** Mechanical wounding negatively impacts the growth of a commercially  
568 available non-miniature tomato. Effect of mechanical wounding on shoot growth of tomato cv.  
569 Santa Clara. Lesions were performed on day 25, as indicated by the dotted line. Control represents  
570 unwounded plants. Data represent the mean  $\pm$  s.e.m of at least 10 plants per treatment. Asterisks  
571 denote significant differences between control and wounded plants at the same age ( $p < 0.05$   
572 according to Student's t-test).

573

574 **Supplemental Figure S2.** Effects of mechanical wounding on tomato shoot dry weight. According  
575 to Student's t-test ( $p < 0.05$ ), no significant alteration was observed when comparing the shoot  
576 biomass (mg) of 45-d old (20 DAW) control and wounded plants. Data represent the mean  $\pm$  s.e.m  
577 of at least 10 plants per treatment. Control represents unwounded plants.



578 **Supplemental Table S1.** Description of the primers used in the experiments.

579

| <b>Primer name</b>                                          | <b>Sequence</b>                                                                                    | <b>Description</b>                                        | <b>Reference</b>    |
|-------------------------------------------------------------|----------------------------------------------------------------------------------------------------|-----------------------------------------------------------|---------------------|
| <i>jai1-1</i> Fw1<br><i>jai1-1</i> Rv1<br><i>jai1-1</i> Rv2 | 5'-GTGGAGACGATATGTTGAGACTAA-3'<br>5'-CCATGGAGTCCATCACCTAACAGT-3'<br>5'-GTGGTCAGATCAGAGCCCTCTATT-3' | Primers for <i>jai1-1</i> genotyping                      | Li et al., 2004     |
| PI-I FW<br>PI-I Rv                                          | 5'-TTGCTCTCCTCCTTTTATTTGG-3'<br>5'-GCAAGCCTTGGCATGTTC-3'                                           | Primers for qPCR analysis of the tomato <i>PI-I</i> gene  | Campos et al., 2009 |
| PI-II FW<br>PI-II Rv                                        | 5'-ATCCTAACATTTGCCCTCA-3'<br>5'-GTGCAACACGTCGTACATCC-3'                                            | Primers for qPCR analysis of the tomato <i>PI-II</i> gene | This work           |

580

581 **Supplemental Table S2.** Density of tomato trichomes in control and wounded plants. Trichomes were classified according to Simmons  
 582 and Gurr (2005). Data represent the mean  $\pm$  s.e.m of at least 10 plants. Asterisks denote significant differences between control and  
 583 wounded plants for the same leaflet face at  $p < 0.05$  (Student's t-test). Control represents unwounded plants.  
 584

| Treatment | Leaflet face | Trichome type per leaflet face (average.cm-2 $\pm$ S.E.M) |                   |                     |                     |                    |
|-----------|--------------|-----------------------------------------------------------|-------------------|---------------------|---------------------|--------------------|
|           |              | I                                                         | III               | V                   | VI                  | VII                |
| Control   | Adaxial      | 5.09 $\pm$ 2.59                                           | 10.18 $\pm$ 3.02  | 129.09 $\pm$ 18.78  | 205.45 $\pm$ 31.99  | 16.00 $\pm$ 3.24   |
| Wounded   | Adaxial      | 8.33 $\pm$ 0.44                                           | 19.33 $\pm$ 0.12* | 224.67 $\pm$ 12.11* | 620.33 $\pm$ 77.31* | 49.33 $\pm$ 9.72*  |
| Control   | Abaxial      | 1.82 $\pm$ 1.13                                           | 9.09 $\pm$ 2.16   | 363.27 $\pm$ 32.16  | 203.27 $\pm$ 20.12  | 19.27 $\pm$ 2.34   |
| Wounded   | Abaxial      | 7.33 $\pm$ 1.76*                                          | 16.33 $\pm$ 3.50  | 590.33 $\pm$ 91.13* | 396.33 $\pm$ 52.44* | 53.00 $\pm$ 12.31* |

585

## Figure 1

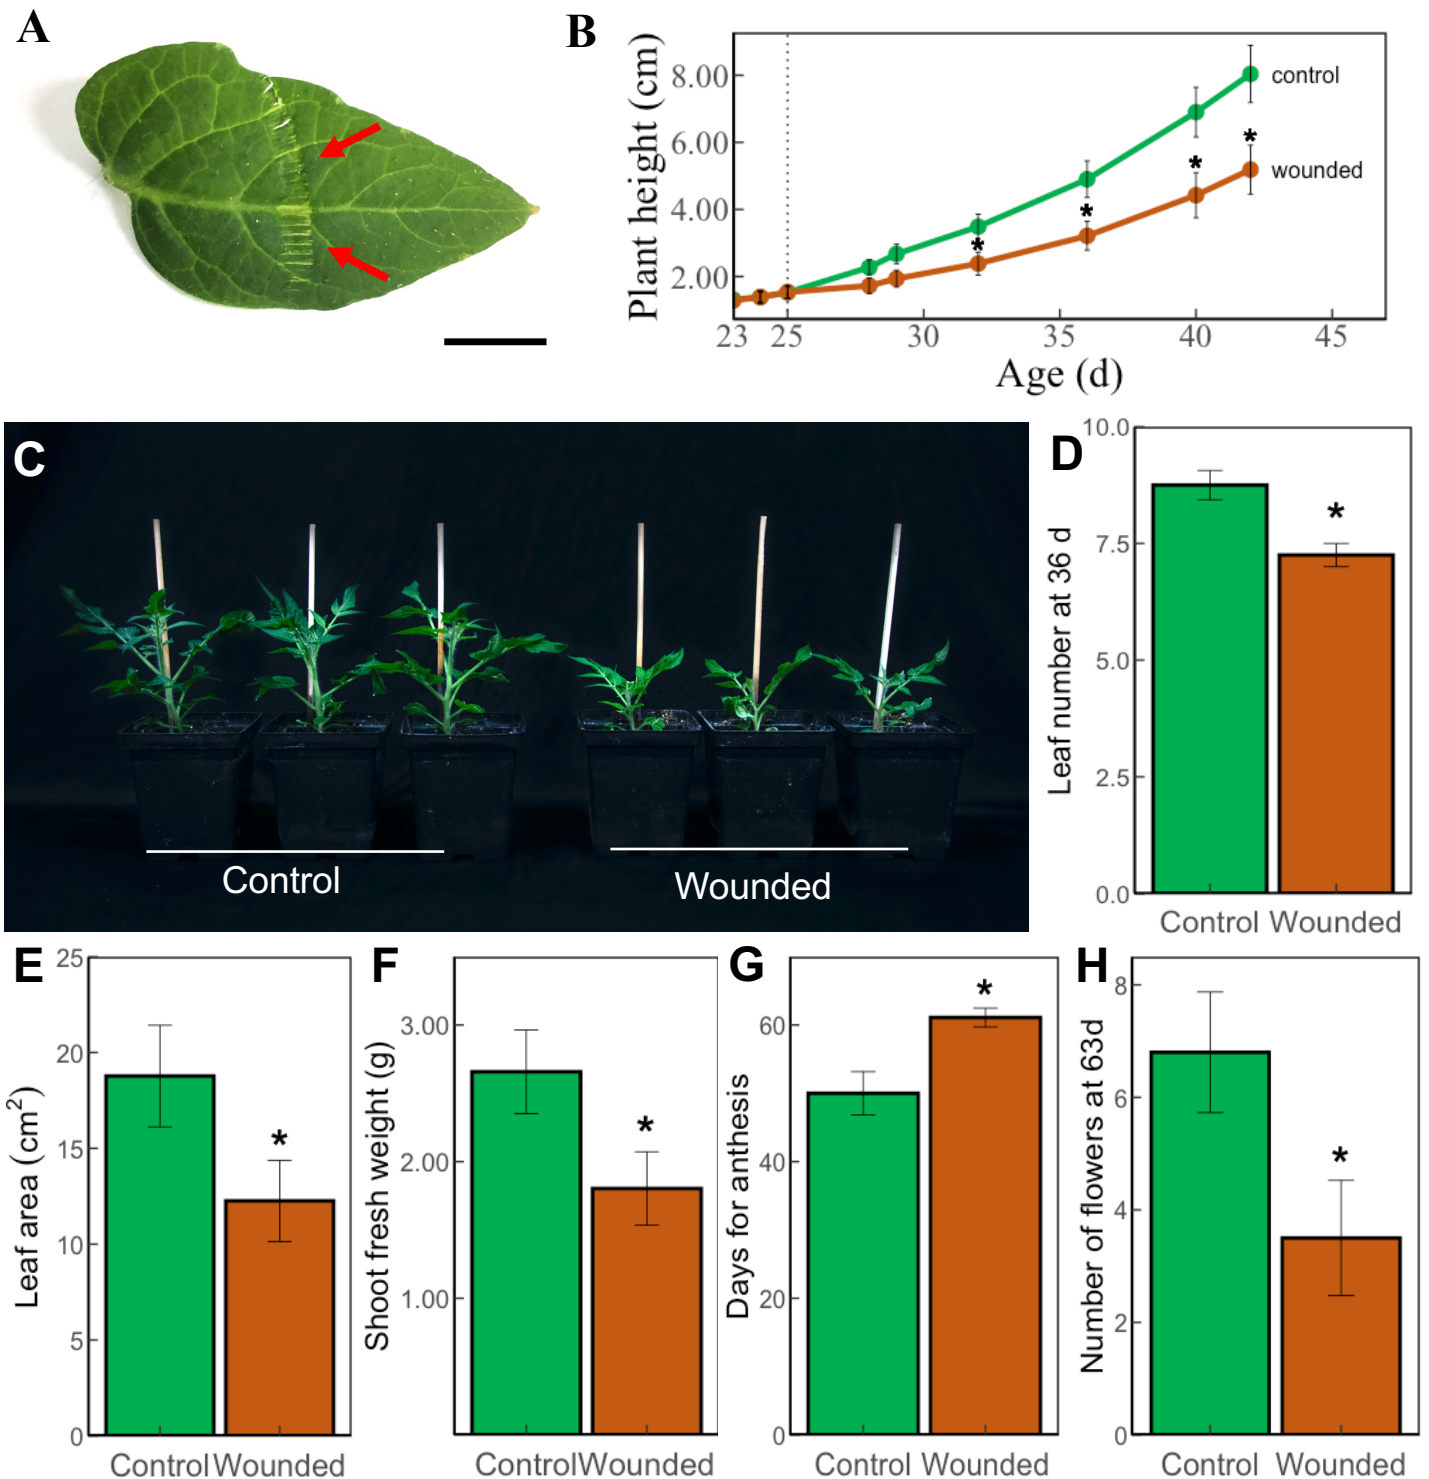

**Figure 1. Effect of mechanical wounding on tomato development.** (A) Tomato (cv.MT) leaflets were repetitively wounded using a serrated hemostat that was firmly clamped across the tissue to cross the midvein and produce clearly visible lesions, as indicated by the red arrows (bar = 1 cm). (B) Effect of wounding on tomato growth rate. Lesions were performed when plants were 25-d old, as indicated by the dotted line. (C) Representative individuals of 42-d old control and wounded plants (17 DAW). (D) Leaf number of 36-d old (11 DAW) and (E) leaf area of 45-d old (20 DAW) control and wounded plants. (F) Shoot fresh weight of 45-d old (20 DAW) control and wounded plants. (G) Average days for anthesis and (H) number of flowers per plant in 63-d old (38 DAW) control and wounded individuals. Data in all graphs represent the mean  $\pm$  s.e.m of at least 8 plants. Controls represent unwounded plants. Asterisks denote significant differences between control and wounded plants at  $p < 0.05$  (Student's t-test).

## Figure 2

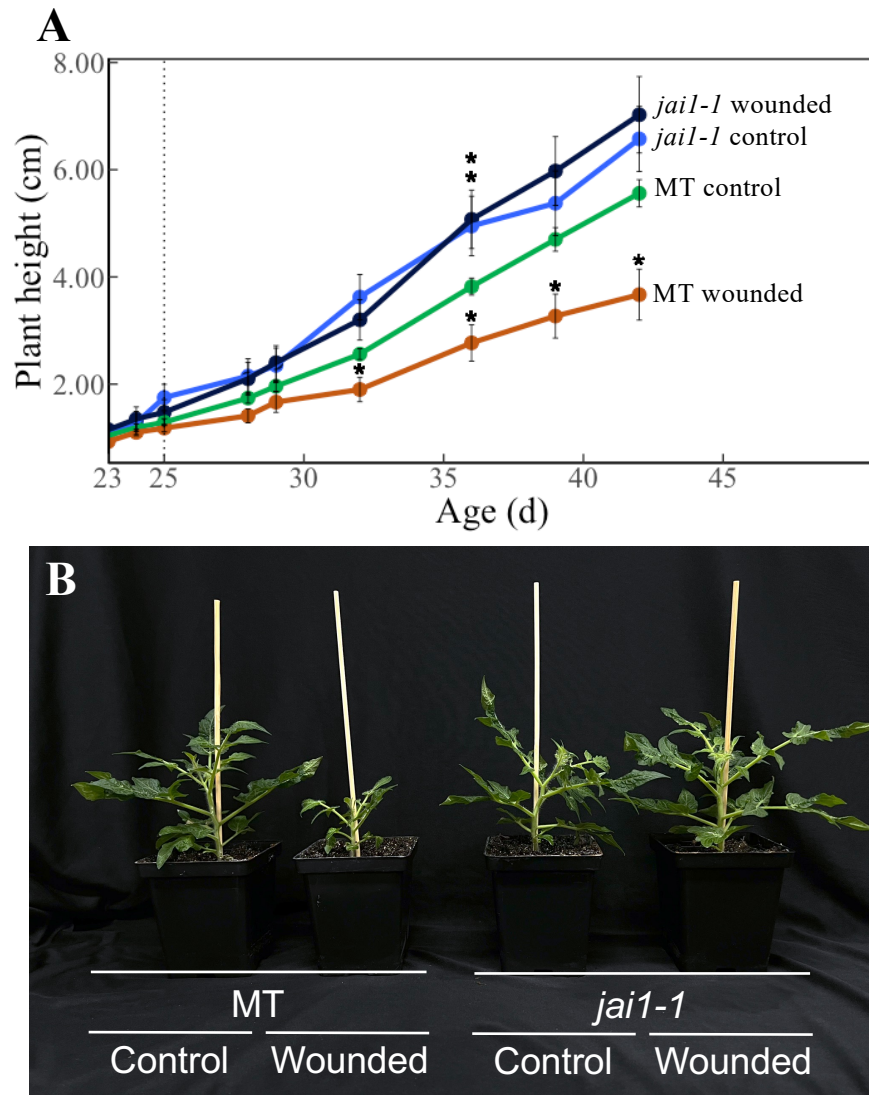

**Figure 2. Tomato wound-induced growth repression is dependent on the jasmonate pathway.** (A) Effect of wounding on the growth rate of MT (wild-type) and *jail-1* mutant plants. Lesions were performed when plants were 25-d old (dotted line). Data represent the mean  $\pm$  s.e.m of at least 8 plants and asterisks denote significant differences when compared to MT control treatment (Student's t-test,  $p < 0.05$ ). (B) Representative individuals of 45-d old MT and *jail-1* control and wounded plants (20 DAW). Data in all graphs represent the mean  $\pm$  s.e.m of at least 8 plants. Controls represent unwounded plants.

## Figure 3

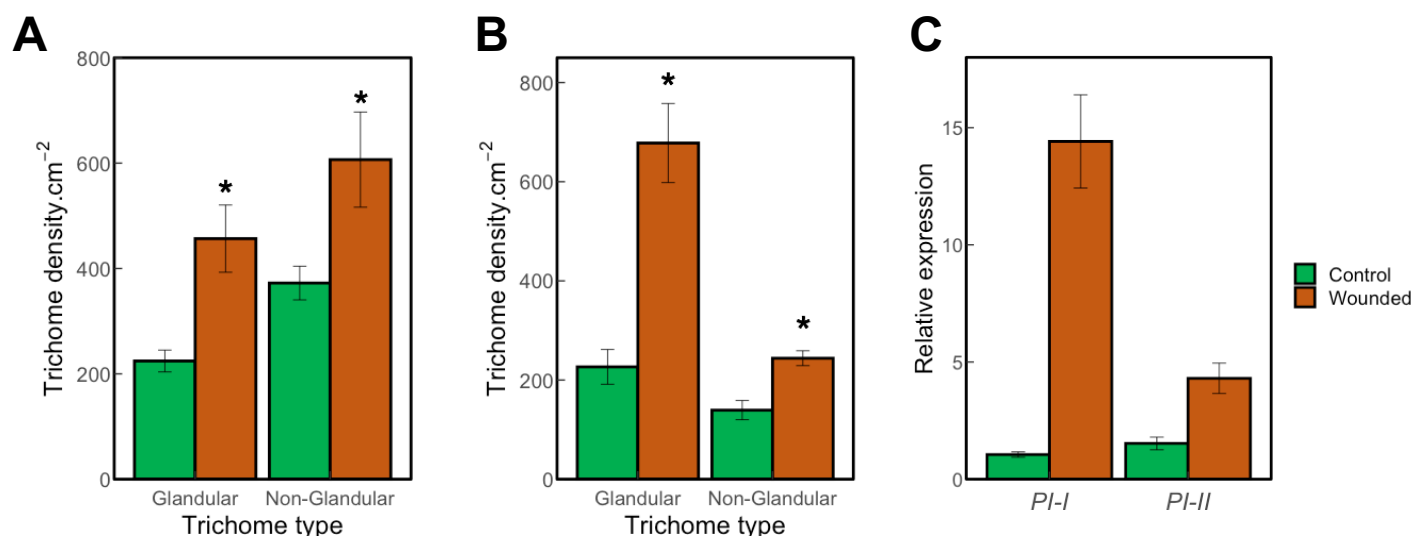

**Figure 3. Mechanical wounding induces defense responses in tomato.** Effect of mechanical wounding on the formation of glandular trichomes (types I, VI and VII) and non-glandular trichomes (types III and V) on the abaxial (A) and adaxial (B) leaves of 45 d-old tomato (20 DAW). Data represent the mean  $\pm$  s.e.m of at least 10 plants. Asterisks denote significant differences between control and wounded plants at  $p < 0.05$  (Student's t-test). (C) qPCR analysis of *PI-I* and *PI-II* gene expression in control and wounded tomato leaflets. RNA was extracted using leaves of 26 d-old plants (24 h after wounding). *PI-I* and *PI-II* expression was normalized according to *GAPDH* transcript levels. Controls represent unwounded plants.
